# Supplementary material for: Metal concentrations and biological effects from one of the largest mining disasters in the world (Brumadinho, Minas Gerais, Brazil)
Source: Springer Nature journal article supplement (doi:10.1038/s41598-020-62700-w), 2020-04-03
Supplement: 41598_2020_62700_MOESM1_ESM.pdf [file 41598_2020_62700_MOESM1_ESM.pdf]

## Supplementary Material

**Manuscript:** Metal concentrations and biological effects from one of the largest mining disasters in the world (Brumadinho, Minas Gerais, Brazil)

**Authors:** Cristiane dos Santos Vergilio, Diego Lacerda, Braulio Cherene Vaz de Oliveira, Echily Sartori, Gabriela Munis Campos, Anna Luiza Pereira, Diego Borges de Aguiar, Tatiana da Silva Souza, Marcelo Gomes de Almeida, Fabiano Thompson, Carlos Eduardo de Rezende

Figure S1. a) Visual aspect water collected at Brumadinho sampling site (S3 – 5.2 km of the Dam rupture area). b) The road complete filled with the mud.

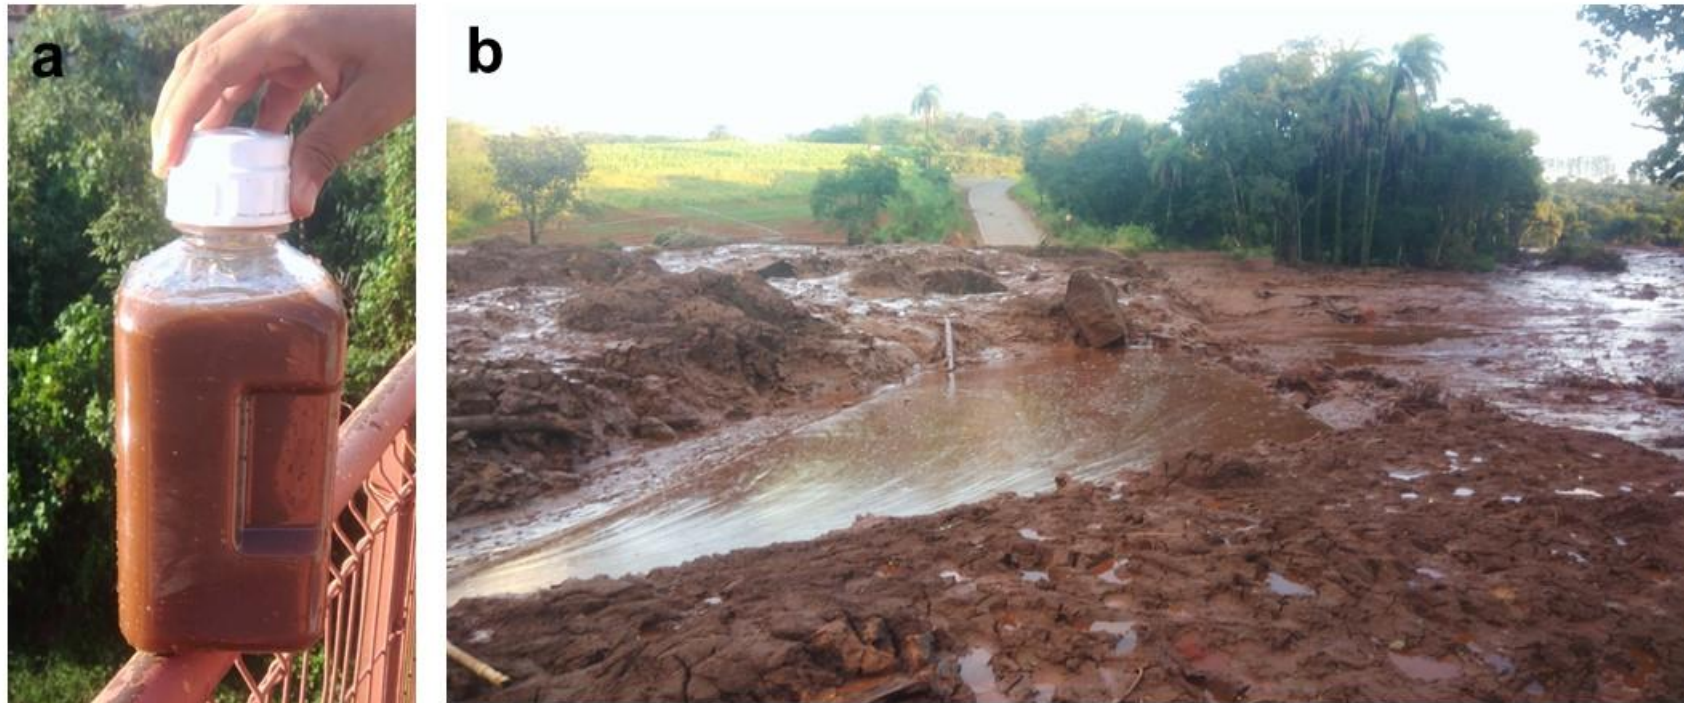

Table S2. Geospatial localization (latitude and longitude), distance of the dam, physical and chemical parameters of the sampling sites after Brumadinho dam rupture. SPM= Superficial Particulate Material, DOC = Dissolved Organic Carbon, TDN = Total Dissolved Nitrogen, DO = Dissolved Oxygen.

| Damming distance (km) | Sites                | Latitude   | Longitude  | SPM (mg/L) | DOC (mg/L) | TDN (mg/L) | Water           |                                   |      |             |           | Sediment |          |          |
|-----------------------|----------------------|------------|------------|------------|------------|------------|-----------------|-----------------------------------|------|-------------|-----------|----------|----------|----------|
|                       |                      |            |            |            |            |            | Turbidity (NTU) | Conductivity ( $\mu\text{s/cm}$ ) | pH   | Temperature | DO (mg/L) | Sand (%) | Silt (%) | Clay (%) |
| -61.3                 | Moeda                | 20°20'40"S | 44°02'25"W | 18.36      | 1.99       | 1          | 6               | 176                               | 7.55 | 27.8        | 4.3       | 100      | 0        | 0        |
| 0                     | Tailing              | 20°09'14"S | 44°09'34"W | -          | -          | -          | -               | -                                 | -    | -           | -         | 30       | 34       | 36       |
| 5.2                   | Brumadinho           | 20°08'27"S | 44°12'03"W | 516.14     | 1.34       | 0.69       | 3000            | 273                               | 7.36 | 28          | 3.92      | 50       | 27       | 23       |
| 48                    | Juatuba              | 19°56'56"S | 44°18'18"W | 8.44       | 1.94       | 1.47       | 6.1             | 233                               | 7.98 | 27.7        | 4.63      | 38       | 40       | 22       |
| 111                   | São José da Varginha | 19°40'13"S | 44°28'51"W | 18.8       | 1.67       | 1.43       | 5.2             | 229                               | 7.25 | 30          | 6.15      | 53       | 30       | 16       |
| 240                   | Angueretá            | 19°10'25"S | 44°42'05"W | 8.32       | 2.21       | 1.18       | 3.6             | 251                               | 7.45 | 29.1        | 5.52      | 42       | 36       | 22       |
| 302                   | Retiro Baixo         | 18°54'09"S | 44°47'02"W | 4.45       | 6.16       | 0.69       | 1.7             | 177                               | 7.55 | 30.4        | 5.32      | 36       | 38       | 26       |



Table S4. Metal concentrations in the water (total and dissolved) of the sampling sites after the Brumadinho Dam rupture. CONAMA values with \* are set from the dissolved fraction.

| Sampling site            | Compartment       | Damming distance (km) | Ag      | Al      | As      | Ba     | Be      | Bi      | Ca     | Cd      | Ce      | Co      | Cr      | Cu      |
|--------------------------|-------------------|-----------------------|---------|---------|---------|--------|---------|---------|--------|---------|---------|---------|---------|---------|
|                          |                   |                       | (mg/L)  | (mg/L)  | (mg/L)  | (mg/L) | (mg/L)  | (mg/L)  | (mg/L) | (mg/L)  | (mg/L)  | (mg/L)  | (mg/L)  | (mg/L)  |
| 1 - Moeda                | Water (Total)     | -61.3                 | <0.0060 | 0.76    | <0.0062 | 0.020  | <0.0001 | <0.0024 | 5.33   | <0.0001 | 0.005   | 0.0047  | 0.005   | 0.015   |
| 3 - Brumadinho           | Water (Total)     | 5.2                   | <0.0060 | 10.02   | <0.0062 | 0.121  | <0.0001 | <0.0024 | 5.30   | 0.007   | 0.010   | 0.0115  | 0.010   | 0.079   |
| 4 - Juatuba              | Water (Total)     | 48                    | <0.0060 | 0.58    | <0.0062 | 0.011  | <0.0001 | <0.0024 | 6.39   | <0.0001 | <0.0016 | <0.0005 | 0.007   | 0.025   |
| 5 - São José da Varginha | Water (Total)     | 111                   | <0.0060 | 0.69    | <0.0062 | 0.022  | <0.0001 | <0.0024 | 6.71   | <0.0001 | <0.0016 | <0.0005 | 0.002   | 0.014   |
| 6 - Angueretá            | Water (Total)     | 240                   | <0.0060 | 0.38    | <0.0062 | 0.020  | <0.0001 | <0.0024 | 6.33   | <0.0001 | <0.0016 | <0.0005 | <0.0003 | 0.019   |
| 7 - Retiro Baixo         | Water (Total)     | 302                   | <0.0060 | 0.27    | <0.0062 | 0.020  | <0.0001 | <0.0024 | 6.35   | <0.0001 | <0.0016 | <0.0005 | <0.0003 | 0.021   |
| 1 - Moeda                | Water (Dissolved) | -61.3                 | <0.0060 | 0.27    | <0.0062 | 0.015  | <0.0001 | <0.0024 | 2.78   | <0.0001 | <0.0016 | <0.0005 | <0.0003 | 0.007   |
| 3 - Brumadinho           | Water (Dissolved) | 5.2                   | <0.0060 | 0.20    | <0.0062 | 0.100  | <0.0001 | <0.0024 | 3.29   | 0.0008  | 0.0018  | <0.0005 | <0.0003 | <0.0006 |
| 4 - Juatuba              | Water (Dissolved) | 48                    | <0.0060 | 0.04    | <0.0062 | 0.007  | <0.0001 | <0.0024 | 3.60   | <0.0001 | <0.0016 | <0.0005 | <0.0003 | 0.007   |
| 5 - São José da Varginha | Water (Dissolved) | 111                   | <0.0060 | 0.08    | <0.0062 | 0.012  | <0.0001 | <0.0024 | 4.46   | <0.0001 | <0.0016 | <0.0005 | 0.001   | 0.001   |
| 6 - Angueretá            | Water (Dissolved) | 240                   | <0.0060 | 0.03    | <0.0062 | 0.006  | <0.0001 | <0.0024 | 4.82   | <0.0001 | <0.0016 | <0.0005 | <0.0003 | <0.0006 |
| 7 - Retiro Baixo         | Water (Dissolved) | 302                   | <0.0060 | 0.18    | <0.0062 | 0.009  | <0.0001 | <0.0024 | 5.42   | <0.0001 | <0.0016 | <0.0005 | <0.0003 | <0.0006 |
|                          | CONAMA            | I                     | 0.01    | 0.10*   | 0.01    | 0.70   | 0.04    | -       | -      | 0.001   | -       | 0.0500  | 0.05    | 0.009*  |
|                          |                   | III                   | 0.05    | 0.20*   | 0.033   | 1.00   | 0.10    | -       | -      | 0.010   | -       | 0.2000  | 0.05    | 0.013*  |
| Sampling site            | Compartment       | Damming distance (km) | Dy      | Er      | Eu      | Fe     | Ga      | Gd      | Hg     | Ho      | In      | K       | La      | Li      |
|                          |                   |                       | (mg/L)  | (mg/L)  | (mg/L)  | (mg/L) | (mg/L)  | (mg/L)  | (mg/L) | (ng/L)  | (mg/L)  | (mg/L)  | (mg/L)  | (mg/L)  |
| 1 - Moeda                | Water (Total)     | -61.3                 | <0.0002 | <0.0003 | <0.0001 | 1.39   | <0.0031 | <0.0004 | 3.55   | <0.0002 | <0.0018 | 1.52    | 0.0041  | 0.0013  |
| 3 - Brumadinho           | Water (Total)     | 5.2                   | <0.0002 | 0.001   | <0.0001 | 48.15  | <0.0031 | 0.009   | 144.26 | 0.0004  | 0.2019  | 1.53    | 0.012   | 0.0041  |
| 4 - Juatuba              | Water (Total)     | 48                    | <0.0002 | <0.0003 | <0.0001 | 0.87   | <0.0031 | <0.0004 | 4.12   | <0.0002 | 0.0089  | 2.12    | <0.0004 | 0.0007  |
| 5 - São José da Varginha | Water (Total)     | 111                   | <0.0002 | <0.0003 | <0.0001 | 0.76   | <0.0031 | <0.0004 | 4.16   | <0.0002 | <0.0018 | 1.92    | <0.0004 | 0.0005  |
| 6 - Angueretá            | Water (Total)     | 240                   | <0.0002 | <0.0003 | <0.0001 | 0.50   | <0.0031 | <0.0004 | 2.46   | <0.0002 | <0.0018 | 1.80    | <0.0004 | 0.0004  |
| 7 - Retiro Baixo         | Water (Total)     | 302                   | <0.0002 | <0.0003 | <0.0001 | 0.28   | <0.0031 | <0.0004 | 1.51   | <0.0002 | <0.0018 | 1.92    | <0.0004 | 0.0004  |
| 1 - Moeda                | Water (Dissolved) | -61.3                 | <0.0002 | <0.0003 | <0.0001 | 0.38   | <0.0031 | <0.0004 | 1.88   | <0.0002 | <0.0018 | 1.28    | <0.0004 | 0.0009  |
| 3 - Brumadinho           | Water (Dissolved) | 5.2                   | <0.0002 | <0.0003 | <0.0001 | 0.84   | <0.0031 | <0.0004 | 1.86   | <0.0002 | <0.0018 | 1.19    | <0.0004 | 0.0013  |
| 4 - Juatuba              | Water (Dissolved) | 48                    | <0.0002 | <0.0003 | <0.0001 | 0.02   | <0.0031 | <0.0004 | 1.01   | <0.0002 | 0.0028  | 1.76    | <0.0004 | 0.0004  |
| 5 - São José da Varginha | Water (Dissolved) | 111                   | <0.0002 | <0.0003 | <0.0001 | 0.07   | <0.0031 | <0.0004 | 1.90   | <0.0002 | <0.0018 | 1.35    | <0.0004 | <0.0002 |
| 6 - Angueretá            | Water (Dissolved) | 240                   | <0.0002 | <0.0003 | <0.0001 | 0.01   | <0.0031 | <0.0004 | 1.31   | <0.0002 | <0.0018 | 1.45    | <0.0004 | <0.0002 |
| 7 - Retiro Baixo         | Water (Dissolved) | 302                   | <0.0002 | <0.0003 | <0.0001 | 0.12   | <0.0031 | <0.0004 | 0.66   | <0.0002 | <0.0018 | 1.00    | <0.0004 | <0.0002 |
|                          | CONAMA            | I                     | -       | -       | -       | 0.30*  | -       | -       | 200    | -       | -       | -       | -       | 2.5000  |
|                          |                   | III                   | -       | -       | -       | 5.00*  | -       | -       | 2000   | -       | -       | -       | -       | 2.5000  |

CONAMA: Conselho Nacional do Meio Ambiente – “National Council of Environment”



Table S4. Continuation.

| Sampling site            | Compartment       | Damming distance (km) | U<br>(mg/L) | V<br>(mg/L) | Y<br>(mg/L) | Yb<br>(mg/L) | Zn<br>(mg/L) |
|--------------------------|-------------------|-----------------------|-------------|-------------|-------------|--------------|--------------|
| 1 - Moeda                | Water (Total)     | -61.3                 | 0.06        | <0.0006     | 0.007       | <0.0002      | 0.016        |
| 3 - Brumadinho           | Water (Total)     | 5.2                   | 0.14        | 0.007       | 0.017       | <0.0002      | 0.042        |
| 4 - Juatuba              | Water (Total)     | 48                    | <0.0088     | <0.0006     | 0.000       | <0.0002      | 0.054        |
| 5 - São José da Varginha | Water (Total)     | 111                   | <0.0088     | <0.0006     | <0.0002     | <0.0002      | 0.005        |
| 6 - Angueretá            | Water (Total)     | 240                   | <0.0088     | <0.0006     | <0.0002     | <0.0002      | <0.0018      |
| 7 - Retiro Baixo         | Water (Total)     | 302                   | <0.0088     | <0.0006     | <0.0002     | <0.0002      | <0.0018      |
| 1 - Moeda                | Water (Dissolved) | -61                   | <0.0088     | <0.0006     | 0.0005      | <0.0002      | 0.004        |
| 3 - Brumadinho           | Water (Dissolved) | 5                     | <0.0088     | <0.0006     | <0.0002     | <0.0002      | 0.029        |
| 4 - Juatuba              | Water (Dissolved) | 48                    | <0.0088     | <0.0006     | <0.0002     | <0.0002      | 0.023        |
| 5 - São José da Varginha | Water (Dissolved) | 111                   | <0.0088     | <0.0006     | <0.0002     | <0.0002      | 0.003        |
| 6 - Angueretá            | Water (Dissolved) | 240                   | <0.0088     | <0.0006     | <0.0002     | <0.0002      | <0.0018      |
| 7 - Retiro Baixo         | Water (Dissolved) | 302                   | <0.0088     | <0.0006     | <0.0002     | <0.0002      | <0.0018      |
|                          | CONAMA            | I                     | 0.02        | 0.10        | -           | -            | 0.18         |
|                          |                   | III                   | 0.02        | 0.10        | -           | -            | 5.00         |

Table S5. Metal concentrations in the sediment of the sampling sites after the Brumadinho Dam rupture.

| Sampling site            | Damming distance (km) | Ag<br>(µg/g) | Al<br>(mg/g) | As<br>(µg/g) | Ba<br>(µg/g) | Be<br>(µg/g) | Bi<br>(µg/g) | Ca<br>(µg/g) | Cd<br>(µg/g) | Ce<br>(µg/g) | Co<br>(µg/g) | Cr<br>(µg/g) | Cu<br>(µg/g) |
|--------------------------|-----------------------|--------------|--------------|--------------|--------------|--------------|--------------|--------------|--------------|--------------|--------------|--------------|--------------|
| 1 - Moeda                | -61.3                 | <0.50        | 8.9          | 10.23        | 135.3        | <0.09        | 2.82         | 292          | 2.62         | 26.88        | 28.21        | 44.4         | 8.94         |
| 2 - Tailing              | 0                     | 1.31         | 10.8         | 4.69         | 76.6         | 0.49         | 15.20        | 161          | 30.94        | 15.05        | 10.43        | 16.4         | 36.03        |
| 3 - Brumadinho           | 5.2                   | 2.31         | 21.7         | 2.43         | 121.8        | 0.91         | 13.24        | 311          | 32.57        | 9.72         | 14.09        | 28.0         | 66.42        |
| 4 - Juatuba              | 48                    | 0.81         | 75.8         | 3.68         | 235.9        | 0.88         | <1.62        | 843          | 7.62         | 34.86        | 10.09        | 50.2         | 24.00        |
| 5 - São José da Varginha | 111                   | <0.50        | 9.9          | <0.90        | 138.0        | <0.09        | 2.05         | 246          | 2.32         | 10.11        | 8.74         | 10.0         | 5.92         |
| 6 - Angueretá            | 240                   | 0.95         | 47.9         | 11.86        | 134.8        | 1.22         | <1.62        | 288          | 8.99         | 8.00         | 14.76        | 92.3         | 36.98        |
| 7 - Retiro Baixo         | 302                   | 0.84         | 37.2         | 14.52        | 158.4        | 1.31         | <1.62        | 159          | 7.39         | 45.51        | 13.79        | 156.1        | 38.24        |
|                          | TEL                   | -            | -            | 5.90         | -            | -            | -            | -            | 0.60         | -            | -            | 37.3         | 35.7         |
|                          | PEL                   | -            | -            | 17.0         | -            | -            | -            | -            | 3.53         | -            | -            | 90           | 197          |
| Sampling site            | Damming distance (km) | Dy<br>(µg/g) | Er<br>(µg/g) | Eu<br>(µg/g) | Fe<br>(mg/g) | Ga<br>(µg/g) | Gd<br>(µg/g) | Hg<br>(ng/g) | Ho<br>(µg/g) | In<br>(µg/g) | K<br>(mg/g)  | La<br>(µg/g) | Li<br>(µg/g) |
| 1 - Moeda                | -61.3                 | 0.76         | <0.40        | <0.44        | 16.1         | 1.08         | 1.77         | 32.0         | <0.42        | 56.3         | 2625         | 2.80         | 7.42         |
| 2 - Tailing              | 0                     | 5.13         | 0.70         | 1.61         | 264.9        | 92.34        | 50.61        | 101.3        | <0.42        | 210.2        | 354          | 22.20        | 8.67         |
| 3 - Brumadinho           | 5.2                   | 7.36         | 0.98         | 1.18         | 279.6        | 113.85       | 48.49        | 184.5        | <0.42        | 402.6        | 961          | 13.82        | 17.32        |
| 4 - Juatuba              | 48                    | 1.47         | 0.96         | 1.33         | 71.9         | 51.27        | 12.17        | 51.5         | <0.42        | 26.1         | 13723        | 16.69        | 24.65        |
| 5 - São José da Varginha | 111                   | 0.86         | <0.40        | <0.44        | 4.9          | <0.66        | 0.53         | 14.0         | <0.42        | 11.1         | 5450         | 1.82         | 3.57         |
| 6 - Angueretá            | 240                   | 3.72         | 1.08         | 1.13         | 71.3         | 59.62        | 12.28        | 63.0         | <0.42        | 57.3         | 13040        | 4.41         | 28.47        |
| 7 - Retiro Baixo         | 302                   | 0.98         | 1.74         | 1.44         | 53.3         | 48.92        | 10.67        | 49.8         | <0.42        | 44.6         | 20412        | 10.75        | 25.62        |
|                          | TEL                   | -            | -            | -            | -            | -            | -            | 174          | -            | -            | -            | -            | -            |
|                          | PEL                   | -            | -            | -            | -            | -            | -            | 486          | -            | -            | -            | -            | -            |
| Sampling site            | Damming distance (km) | Lu<br>(µg/g) | Mg<br>(µg/g) | Mn<br>(mg/g) | Mo<br>(µg/g) | Na<br>(µg/g) | Nd<br>(µg/g) | Ni<br>(µg/g) | P<br>(µg/g)  | Pb<br>(µg/g) | Pr<br>(µg/g) | Rb<br>(µg/g) | Rh<br>(µg/g) |
| 1 - Moeda                | -61.3                 | 0.49         | 211          | 0.99         | <1.25        | 874          | 9.99         | 22.03        | 50           | 3.03         | 1.02         | 15.65        | <0.66        |
| 2 - Tailing              | 0                     | 6.33         | 236          | 4.78         | <1.25        | 232          | 14.19        | 17.20        | 1031         | 14.65        | 39.48        | 2.26         | <0.66        |
| 3 - Brumadinho           | 5.2                   | 6.09         | 464          | 10.51        | <1.25        | 139          | 10.28        | 24.16        | 1347         | 18.38        | 37.65        | 2.78         | <0.66        |
| 4 - Juatuba              | 48                    | 1.60         | 970          | 0.99         | <1.25        | 2428         | 22.85        | 18.56        | 506          | 14.87        | 9.99         | 72.31        | <0.66        |
| 5 - São José da Varginha | 111                   | <0.47        | 113          | 0.24         | <1.25        | 1567         | 9.46         | 9.58         | 26           | <0.40        | <0.59        | 31.90        | <0.66        |
| 6 - Angueretá            | 240                   | 1.66         | 315          | 2.59         | <1.25        | 961          | 8.70         | 32.84        | 576          | 10.01        | 9.49         | 22.97        | <0.66        |
| 7 - Retiro Baixo         | 302                   | 1.45         | 960          | 0.53         | <1.25        | 460          | 15.54        | 32.18        | 346          | 12.90        | 9.28         | 56.60        | <0.66        |
|                          | TEL                   | -            | -            | -            | -            | -            | -            | 18           | -            | 35.8         | -            | -            | -            |
|                          | PEL                   | -            | -            | -            | -            | -            | -            | 36           | -            | 91.3         | -            | -            | -            |

Table S5. Continuation.

| Sampling site            | Damming distance (km) | S      | Sb     | Sc     | Se     | Sm     | Sn     | Sr     | Tb     | Th     | Ti     | Tl     | Tm     |
|--------------------------|-----------------------|--------|--------|--------|--------|--------|--------|--------|--------|--------|--------|--------|--------|
|                          |                       | (µg/g) | (µg/g) | (µg/g) | (µg/g) | (µg/g) | (µg/g) | (µg/g) | (µg/g) | (µg/g) | (mg/g) | (µg/g) | (µg/g) |
| 1 - Moeda                | -61.3                 | 280    | <0.53  | 1.63   | <0.90  | <0.47  | 20.6   | 12.6   | 2.48   | <1.04  | 0.40   | <0.73  | <0.49  |
| 2 - Tailing              | 0                     | 241    | 0.69   | 2.41   | <0.90  | <0.47  | 547.4  | 15.0   | 42.18  | <1.04  | 0.43   | <0.73  | <0.49  |
| 3 - Brumadinho           | 5.2                   | 266    | 1.65   | 2.52   | <0.90  | <0.47  | 619.8  | 26.8   | 43.87  | <1.04  | 0.59   | <0.73  | <0.49  |
| 4 - Juatuba              | 48                    | 417    | <0.53  | 7.10   | <0.90  | <0.47  | 146.3  | 19.3   | 7.89   | <1.04  | 2.93   | <0.73  | <0.49  |
| 5 - São José da Varginha | 111                   | 189    | 2.94   | 0.69   | <0.90  | <0.47  | 0.7    | 16.0   | 1.06   | <1.04  | 0.21   | <0.73  | <0.49  |
| 6 - Angueretá            | 240                   | 394    | <0.53  | 3.56   | <0.90  | <0.47  | 161.2  | <0.10  | 8.29   | <1.04  | 3.81   | <0.73  | <0.49  |
| 7 - Retiro Baixo         | 302                   | 339    | <0.53  | 5.72   | <0.90  | <0.47  | 117.7  | <0.10  | 5.73   | <1.04  | 3.46   | <0.73  | <0.49  |
|                          | TEL                   | -      | -      | -      | -      | -      | -      | -      | -      | -      | -      | -      | -      |
|                          | PEL                   | -      | -      | -      | -      | -      | -      | -      | -      | -      | -      | -      | -      |
| Sampling site            | Damming distance (km) | U      | V      | Y      | Yb     | Zn     |        |        |        |        |        |        |        |
|                          |                       | (µg/g) | (µg/g) | (µg/g) | (µg/g) | (µg/g) |        |        |        |        |        |        |        |
| 1 - Moeda                | -61.3                 | 57.1   | 23.54  | 1.58   | <0.46  | 11.86  |        |        |        |        |        |        |        |
| 2 - Tailing              | 0                     | 1457.4 | 27.81  | 13.96  | 1.30   | 68.50  |        |        |        |        |        |        |        |
| 3 - Brumadinho           | 5.2                   | 1674.1 | 36.08  | 11.42  | 1.34   | 89.51  |        |        |        |        |        |        |        |
| 4 - Juatuba              | 48                    | 390.3  | 74.37  | 6.95   | 0.62   | 79.38  |        |        |        |        |        |        |        |
| 5 - São José da Varginha | 111                   | 21.5   | 7.67   | 1.17   | <0.46  | 6.16   |        |        |        |        |        |        |        |
| 6 - Angueretá            | 240                   | 421.0  | 126.11 | 0.67   | <0.46  | 76.04  |        |        |        |        |        |        |        |
| 7 - Retiro Baixo         | 302                   | 318.3  | 125.08 | 5.08   | 0.59   | 48.98  |        |        |        |        |        |        |        |
|                          | TEL                   | -      | -      | -      | -      | 123    |        |        |        |        |        |        |        |
|                          | PEL                   | -      | -      | -      | -      | 315    |        |        |        |        |        |        |        |



Table S6. Metal concentrations in the *D. rerio* muscle of the sampling sites after the Brumadinho Dam rupture.  $\pm$  standard deviation.

| Compartment | Damming distance (km) | Sites                | Al                | Fe               | Mn               |
|-------------|-----------------------|----------------------|-------------------|------------------|------------------|
| Water       | -61.3                 | Moeda                | 10.04 $\pm$ 5.43  | 17.99 $\pm$ 8.11 | 6.3 $\pm$ 4.88   |
|             | 5.2                   | Brumadinho           | 16.29 $\pm$ 11.55 | 18.84 $\pm$ 4.44 | 6.16 $\pm$ 5.67  |
|             | 48                    | Juatuba              | 13.96 $\pm$ 1.66  | 17.13 $\pm$ 2.04 | 2.47 $\pm$ 0.27  |
|             | 111                   | São José da Varginha | 19.41 $\pm$ 14.33 | 19.04 $\pm$ 2.44 | 1.87 $\pm$ 0.2   |
|             | 240                   | Angueretá            | 10.37 $\pm$ 5.01  | 19.68 $\pm$ 8.1  | 1.77 $\pm$ 0.11  |
|             | 302                   | Retiro Baixo         | 8.15 $\pm$ 3.52   | 10.91 $\pm$ 1.13 | 1.57 $\pm$ 0.05  |
|             |                       |                      | Mean              | 13.04 $\pm$ 4.29 | 17.27 $\pm$ 3.24 |
| Sediment    | -61.3                 | Moeda                | 4.99 $\pm$ 0.81   | 12.93 $\pm$ 9.15 | 1.91 $\pm$ 0.15  |
|             | 5.2                   | Brumadinho           | 7.75 $\pm$ 5.81   | 37.71 $\pm$ 9.32 | 5.93 $\pm$ 2.01  |
|             | 48                    | Juatuba              | 22.49 $\pm$ 2.03  | 16.88 $\pm$ 4.33 | 2.69 $\pm$ 0.58  |
|             | 111                   | São José da Varginha | 2.99              | 5.35 $\pm$ 0.32  | 2.21 $\pm$ 0.05  |
|             | 240                   | Angueretá            | 12.83 $\pm$ 7.99  | 11.49 $\pm$ 0.21 | 2.61 $\pm$ 0.32  |
|             | 302                   | Retiro Baixo         | 11.5 $\pm$ 0.72   | 8.44 $\pm$ 0.34  | 1.35 $\pm$ 0.02  |
|             |                       |                      | Mean              | 10.43 $\pm$ 6.99 | 15.47 $\pm$ 11.6 |
|             | control               |                      | 3.33 $\pm$ 3.27   | 5.99 $\pm$ 3.99  | 1.27 $\pm$ 0.25  |

Video. Video with satellite images (©Maxar Technologies) obtained from Google Earth Pro (version 7.3.2.5776), before (July 21, 2018) and after the dam failure (March 14, 2019). The video was produced using the power point software (Microsoft Office Professional Plus - 2019 - Version 1808).
